# Supplementary material for: Transcriptome Analysis Reveals the Effect of PdhR in Plesiomonas shigelloides
Source: MDPI journal article supplement (doi:10.3390/ijms241914473), 2023-09-23
Supplement: s1 [file s1]

**Fig. S1**

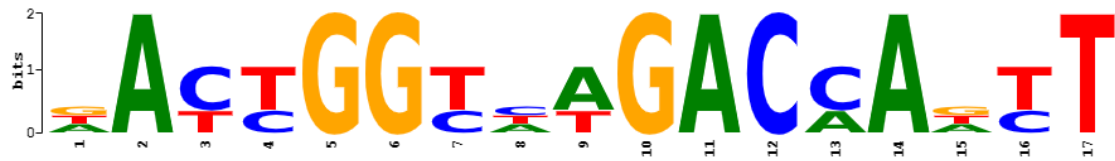

**Fig. S1** The PdhR binding sites published on the PRODORIC website. The height of each letter presents the relative frequency of each base at different positions in the consensus sequence.

**Fig. S2**

|             |                                                                                              |
|-------------|----------------------------------------------------------------------------------------------|
| <i>pdhR</i> | CGTTAA <b>AATGGT</b> CTG <b>ACCAATT</b> TAAG<br>CGTAAA <b>ATTGGT</b> AAT <b>ACCAATT</b> GACA |
| <i>napF</i> | CTTT <b>CGGGGT</b> ATT <b>ACCATT</b> TAACG                                                   |
| <i>metR</i> | CAATAC <b>ATGGT</b> CAT <b>ACCAAG</b> CAAAA                                                  |
| <i>nuoA</i> | ATGAAG <b>TTGCTT</b> CT <b>ACCGATT</b> GTCCT                                                 |
| <i>tfoX</i> | AATT <b>ATTGCGT</b> GTT <b>ACAAATT</b> AAAG                                                  |

**Fig. S2** Potential PdhR binding sites (base marked in red) were predicted in the promoters of five genes, namely *pdhR*, *napF*, *metR*, *nuoA*, and *tfoX*.

**Fig. S3**

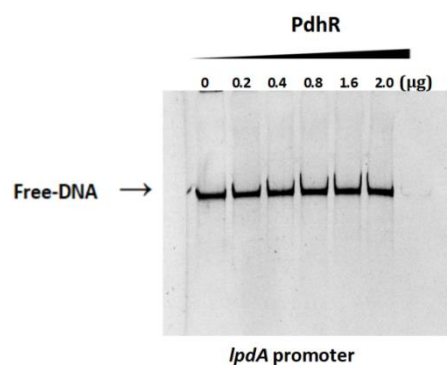

**Fig. S3** The EMSAs between PdhR protein and the *lpdA* promoter.

**Fig. S4**

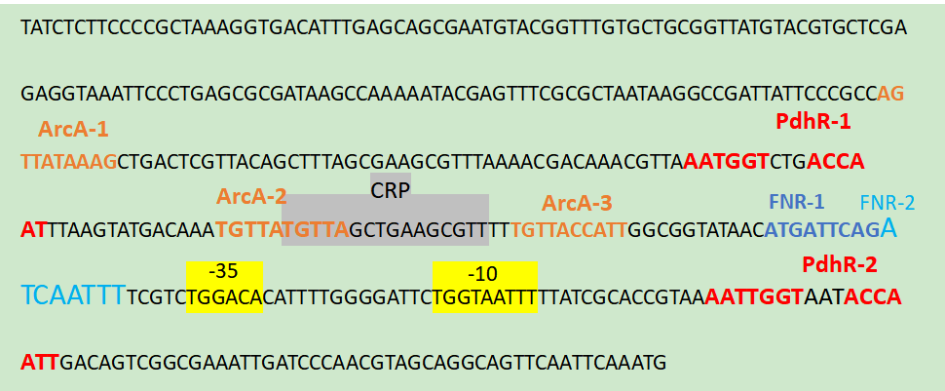

**Fig. S4** PdhR, FNR, ArcA, and cAMP-CRP binding sites were predicted in the promoter of *pdhR* by the PRODORIC website.

**Fig. S5**

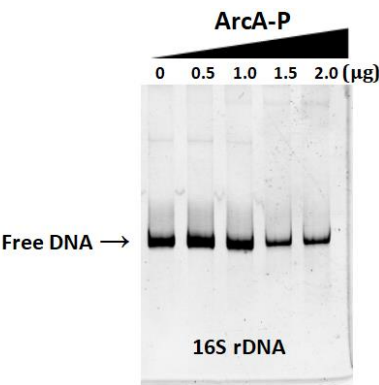

**Fig. S5** The EMSAs between phosphorylated ArcA and 16S rDNA as a control.

**Fig. S6**

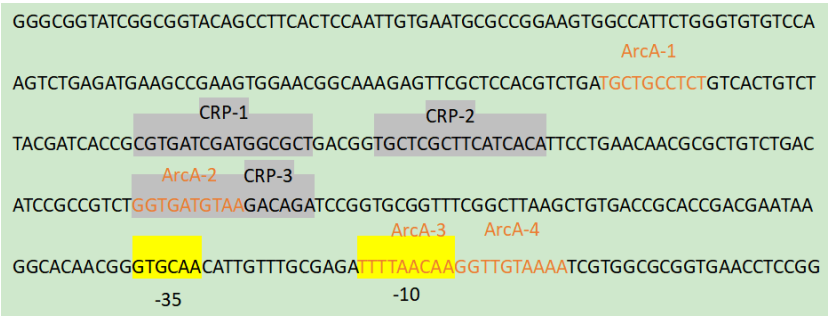

**Fig. S6** -10 and -35 regions were predicted in the promoter of *lpdA* by the Softberry website.

**Fig. S7**

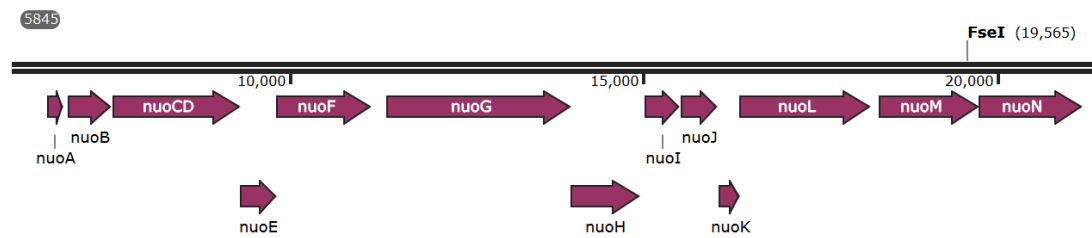

**Fig. S7** NADH-quinone oxidoreductase (NDH-1) gene cluster (*nuoA-nuoN*) in the *P. shigelloides* genome.

**Fig. S8**

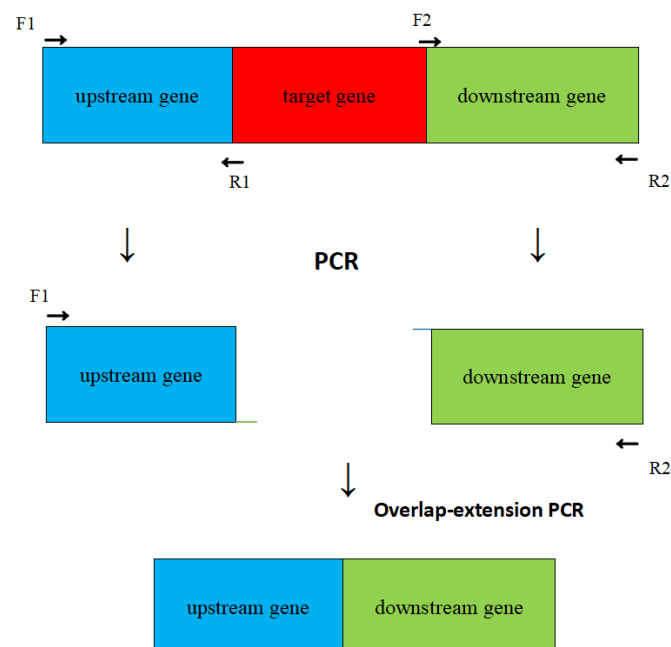

**Fig. S8** Graphical process of the deletion of the target gene in this study. The genome was used as a template, and the upstream and downstream genes of the target gene were amplified by PCR using two pairs of primers F1 and R1, and F2 and R2, respectively. Furthermore, F1 and R2 contain the restriction sites carried by the pRE112 plasmid, and F2 and R1 contain reverse complementary sequences of 10 bases of each other in their respective 5' ends. Subsequently, the upstream and downstream genes were simultaneously used as templates and linked together by Overlap-extension PCR using F1 and R2. After that, the upstream and downstream ligation fragments and the pRE112 plasmid were reconstructed into new vectors by restriction enzyme digestion as well as T4 DNA ligase ligation, which was subsequently transferred to *E. coli* S17-1  $\lambda$ pir and conjured with the WT strain, and mutant strains successfully homologous recombinant were screened out by corresponding antibiotics.

**Table S1 Bacterial strains and plasmids used in this study.**

| Strains/plasmids                        | Genotype or relevant characteristics <sup>a</sup>                                       | Source or reference          |
|-----------------------------------------|-----------------------------------------------------------------------------------------|------------------------------|
| <i>Plesiomonas shigelloides</i> strains |                                                                                         |                              |
| G5884                                   | Wild type, serotype O45:H2 <sup>b</sup> ; Amp <sup>r</sup>                              | CNCTC <sup>b</sup> Aer 44/89 |
| $\Delta pdhR$                           | <i>pdhR</i> gene deletion mutant of G5884; Amp <sup>r</sup>                             | This study                   |
| $\Delta pdhR/pdhR^+$                    | the complementation of <i>pdhR</i> in <i>P. shigelloides</i> ; Amp <sup>r</sup>         | This study                   |
| $\Delta arcA$                           | <i>arcA</i> gene deletion mutant of G5884; Amp <sup>r</sup>                             | This study                   |
| $\Delta fnr$                            | <i>fnr</i> gene deletion mutant of G5884; Amp <sup>r</sup>                              | This study                   |
| $\Delta crp$                            | <i>crp</i> gene deletion mutant of G5884; Amp <sup>r</sup>                              | This study                   |
| WT/lux                                  | WT containing pMS402; Amp <sup>r</sup> , Km <sup>r</sup>                                | This study                   |
| WT/ <i>flgB</i> -lux                    | WT containing pMS402 carrying <i>flgB</i> promoter; Amp <sup>r</sup> , Km <sup>r</sup>  | This study                   |
| WT/ <i>flgP</i> -lux                    | WT containing pMS402 carrying <i>flgP</i> promoter; Amp <sup>r</sup> , Km <sup>r</sup>  | This study                   |
| WT/ <i>flhA</i> -lux                    | WT containing pMS402 carrying <i>flhA</i> promoter; Amp <sup>r</sup> , Km <sup>r</sup>  | This study                   |
| WT/ <i>flaC</i> -lux                    | WT containing pMS402 carrying <i>flaC</i> promoter; Amp <sup>r</sup> , Km <sup>r</sup>  | This study                   |
| WT/ <i>fliML</i> -lux                   | WT containing pMS402 carrying <i>fliML</i> promoter; Amp <sup>r</sup> , Km <sup>r</sup> | This study                   |

---

|                                                     |                                                                                                                         |            |
|-----------------------------------------------------|-------------------------------------------------------------------------------------------------------------------------|------------|
| WT/ <i>flgB<sub>L</sub></i> -lux                    | WT containing pMS402 carrying <i>flgB<sub>L</sub></i> promoter;<br>Amp <sup>r</sup> , Km <sup>r</sup>                   | This study |
| WT/ <i>flgD<sub>L</sub></i> -lux                    | WT containing pMS402 carrying <i>flgD<sub>L</sub></i> promoter;<br>Amp <sup>r</sup> , Km <sup>r</sup>                   | This study |
| WT/ <i>fliC</i> -lux                                | WT containing pMS402 carrying <i>fliC</i> promoter;<br>Amp <sup>r</sup> , Km <sup>r</sup>                               | This study |
| WT/ <i>fliK<sub>L</sub></i> -lux                    | WT containing pMS402 carrying <i>fliK<sub>L</sub></i> promoter;<br>Amp <sup>r</sup> , Km <sup>r</sup>                   | This study |
| $\Delta$ <i>pdhR</i> / <i>flgB</i> -lux             | $\Delta$ <i>pdhR</i> containing pMS402 carrying <i>flgB</i> promoter;<br>Amp <sup>r</sup> , Km <sup>r</sup>             | This study |
| $\Delta$ <i>pdhR</i> / <i>flgP</i> -lux             | $\Delta$ <i>pdhR</i> containing pMS402 carrying <i>flgP</i> promoter;<br>Amp <sup>r</sup> , Km <sup>r</sup>             | This study |
| $\Delta$ <i>pdhR</i> / <i>flhA</i> -lux             | $\Delta$ <i>pdhR</i> containing pMS402 carrying <i>flhA</i> promoter;<br>Amp <sup>r</sup> , Km <sup>r</sup>             | This study |
| $\Delta$ <i>pdhR</i> / <i>flaC</i> -lux             | $\Delta$ <i>pdhR</i> containing pMS402 carrying <i>flaC</i> promoter;<br>Amp <sup>r</sup> , Km <sup>r</sup>             | This study |
| $\Delta$ <i>pdhR</i> / <i>fliM<sub>L</sub></i> -lux | $\Delta$ <i>pdhR</i> containing pMS402 carrying <i>fliM<sub>L</sub></i> promoter;<br>Amp <sup>r</sup> , Km <sup>r</sup> | This study |
| $\Delta$ <i>pdhR</i> / <i>flgB<sub>L</sub></i> -lux | $\Delta$ <i>pdhR</i> containing pMS402 carrying <i>flgB<sub>L</sub></i> promoter;<br>Amp <sup>r</sup> , Km <sup>r</sup> | This study |
| $\Delta$ <i>pdhR</i> / <i>flgD<sub>L</sub></i> -lux | $\Delta$ <i>pdhR</i> containing pMS402 carrying <i>flgD<sub>L</sub></i> promoter;<br>Amp <sup>r</sup> , Km <sup>r</sup> | This study |

---

---

|                                    |                                                                                                                            |
|------------------------------------|----------------------------------------------------------------------------------------------------------------------------|
| <i>ΔpdhR/fliC</i> -lux             | <i>ΔpdhR</i> containing pMS402 carrying <i>fliC</i> promoter; This study<br>Amp <sup>r</sup> , Km <sup>r</sup>             |
| <i>ΔpdhR/fliK<sub>L</sub></i> -lux | <i>ΔpdhR</i> containing pMS402 carrying <i>fliK<sub>L</sub></i> promoter; This study<br>Amp <sup>r</sup> , Km <sup>r</sup> |
| WT/ <i>pdhR</i> -lux               | WT containing pMS402 carrying <i>pdhR</i> promoter; This study<br>Amp <sup>r</sup> , Km <sup>r</sup>                       |
| WT/ <i>metR</i> -lux               | WT containing pMS402 carrying <i>metR</i> promoter; This study<br>Amp <sup>r</sup> , Km <sup>r</sup>                       |
| WT/ <i>nuoA</i> -lux               | WT containing pMS402 carrying <i>nuoA</i> promoter; This study<br>Amp <sup>r</sup> , Km <sup>r</sup>                       |
| <i>ΔpdhR/pdhR</i> -lux             | <i>ΔpdhR</i> containing pMS402 carrying <i>pdhR</i> promoter; Amp <sup>r</sup> , Km <sup>r</sup> This study                |
| <i>ΔpdhR/metR</i> -lux             | <i>ΔpdhR</i> containing pMS402 carrying <i>metR</i> promoter; This study<br>Amp <sup>r</sup> , Km <sup>r</sup>             |
| <i>ΔpdhR/nuoA</i> -lux             | <i>ΔpdhR</i> containing pMS402 carrying <i>nuoA</i> promoter; Amp <sup>r</sup> , Km <sup>r</sup> This study                |
| <i>ΔarcA/pdhR</i> -lux             | <i>ΔarcA</i> containing pMS402 carrying <i>pdhR</i> promoter; This study<br>Amp <sup>r</sup> , Km <sup>r</sup>             |
| <i>ΔarcA/lpdA</i> -lux             | <i>ΔarcA</i> containing pMS402 carrying <i>lpdA</i> promoter; This study<br>Amp <sup>r</sup> , Km <sup>r</sup>             |
| <i>Δfnr/pdhR</i> -lux              | <i>Δfnr</i> containing pMS402 carrying <i>pdhR</i> promoter; This study<br>Amp <sup>r</sup> , Km <sup>r</sup>              |

---

---

|                             |                                                                                                                                                                                                 |                |
|-----------------------------|-------------------------------------------------------------------------------------------------------------------------------------------------------------------------------------------------|----------------|
| $\Delta fnr/ldA$ -lux       | $\Delta fnr$ containing pMS402 carrying <i>ldA</i> promoter;<br>Amp <sup>r</sup> , Km <sup>r</sup>                                                                                              | This study     |
| $\Delta crp/pdhR$ -lux      | $\Delta crp$ containing pMS402 carrying <i>pdhR</i> promoter;<br>Amp <sup>r</sup> , Km <sup>r</sup>                                                                                             | This study     |
| $\Delta crp/ldA$ -lux       | $\Delta crp$ containing pMS402 carrying <i>ldA</i> promoter;<br>Amp <sup>r</sup> , Km <sup>r</sup>                                                                                              | This study     |
| pBAD33- <i>pdhR</i> -3×Flag | WT containing plasmid pBAD33- <i>pdhR</i> -3×Flag;<br>Amp <sup>r</sup> , Cm <sup>r</sup>                                                                                                        | This study     |
| pBAD33- <i>arcA</i> -3×Flag | $\Delta arcA$ containing plasmid pBAD33- <i>pdhR</i> -3×Flag;<br>Amp <sup>r</sup> , Cm <sup>r</sup>                                                                                             | This study     |
| <i>E. coli</i> strains      |                                                                                                                                                                                                 |                |
| DH5 $\alpha$ $\lambda pir$  | Transformation host                                                                                                                                                                             | Lab collection |
| S17-1 $\lambda pir$         | Tp <sup>R</sup> Sm <sup>R</sup> <i>recA</i> , <i>thi</i> , <i>pro</i> , <i>hsdR</i> -M <sup>+</sup> RP4: 2-Tc:Mu: Km<br>Tn7 $\lambda pir$ , Km <sup>r</sup> , Sm <sup>r</sup> , Tp <sup>r</sup> | Lab collection |
| BL21(DE3)                   | Host strain for protein expression                                                                                                                                                              | Lab collection |
| BL21/pET- <i>pdhR</i>       | BL21 with pET28a carrying the <i>pdhR</i> gene; Km <sup>r</sup>                                                                                                                                 | This study     |
| BL21/pET- <i>arcA</i>       | BL21 with pET28a carrying the <i>arcA</i> gene; Km <sup>r</sup>                                                                                                                                 | This study     |
| BL21/pMAL-c5X- <i>fnr</i>   | BL21 with pMAL-c5X carrying the <i>fnr</i> gene; Amp <sup>r</sup>                                                                                                                               | This study     |
| BL21/pMAL-c5X- <i>crp</i>   | BL21 with pMAL-c5X carrying the <i>crp</i> gene; Amp <sup>r</sup>                                                                                                                               | This study     |
| Plasmids                    |                                                                                                                                                                                                 |                |

---

|                                  |                                                                                                     |                |
|----------------------------------|-----------------------------------------------------------------------------------------------------|----------------|
| pRE112                           | Widely used gene knocked vector, with onT RP4; Cm <sup>r</sup>                                      | Lab collection |
| pMS402                           | For construct promoter-luxCDABE reporter fusion; Km <sup>r</sup>                                    | Lab collection |
| pRE112- <i>pdhR</i> <sup>-</sup> | pRE112 containing the homologous arms of <i>pdhR</i> gene of G5884; Cm <sup>r</sup>                 | This study     |
| pRE112- <i>pdhR</i> <sup>+</sup> | pRE112 containing the homologous arms of <i>pdhR</i> and <i>pdhR</i> gene of G5884; Cm <sup>r</sup> | This study     |
| pRE112- <i>arcA</i> <sup>-</sup> | pRE112 containing the homologous arms of <i>arcA</i> cluster of G5884; Cm <sup>r</sup>              | This study     |
| pRE112- <i>fnr</i> <sup>-</sup>  | pRE112 containing the homologous arms of <i>fnr</i> cluster of G5884; Cm <sup>r</sup>               | This study     |
| pRE112- <i>crp</i> <sup>-</sup>  | pRE112 containing the homologous arms of <i>crp</i> cluster of G5884; Cm <sup>r</sup>               | This study     |
| pBAD33- <i>pdhR</i> -3×Flag      | pBAD33 carrying the <i>pdhR</i> gene with 3×Flag; Cmr                                               | This study     |
| pBAD33- <i>arcA</i> -3×Flag      | pBAD33 carrying the <i>arcA</i> gene with 3×Flag; Cmr                                               | This study     |
| pMS402- <i>flgB</i>              | pMS402 with <i>flgB</i> promoter; Km <sup>r</sup>                                                   | This study     |
| pMS402- <i>flgP</i>              | pMS402 with <i>flgP</i> promoter; Km <sup>r</sup>                                                   | This study     |
| pMS402- <i>flhA</i>              | pMS402 with <i>flhA</i> promoter; Km <sup>r</sup>                                                   | This study     |
| pMS402- <i>flaC</i>              | pMS402 with <i>flaC</i> promoter; Km <sup>r</sup>                                                   | This study     |
| pMS402- <i>fliM<sub>L</sub></i>  | pMS402 with <i>fliM<sub>L</sub></i> promoter; Km <sup>r</sup>                                       | This study     |
| pMS402- <i>flgB<sub>L</sub></i>  | pMS402 with <i>flgB<sub>L</sub></i> promoter; Km <sup>r</sup>                                       | This study     |
| pMS402- <i>flgD<sub>L</sub></i>  | pMS402 with <i>flgD<sub>L</sub></i> promoter; Km <sup>r</sup>                                       | This study     |



|                                 |                                                               |            |
|---------------------------------|---------------------------------------------------------------|------------|
| pMS402- <i>fliC</i>             | pMS402 with <i>fliC</i> promoter; Km <sup>r</sup>             | This study |
| pMS402- <i>fliK<sub>L</sub></i> | pMS402 with <i>fliK<sub>L</sub></i> promoter; Km <sup>r</sup> | This study |
| pMS402- <i>pdhR</i>             | pMS402 with <i>pdhR</i> promoter; Km <sup>r</sup>             | This study |
| pMS402- <i>metR</i>             | pMS402 with <i>metR</i> promoter; Km <sup>r</sup>             | This study |
| pMS402- <i>nuoA</i>             | pMS402 with <i>nuoA</i> promoter; Km <sup>r</sup>             | This study |
| pMS402- <i>lpdA</i>             | pMS402 with <i>lpdA</i> promoter; Km <sup>r</sup>             | This study |

<sup>a</sup> r = resistant.

<sup>b</sup> CNCTC, Czech National Collection of Type Cultures, the Czech Republic.

**Table S2 Primers used in this study**

| Name                                | Sequence (5'–3')                        |
|-------------------------------------|-----------------------------------------|
| Primers for construction of mutants |                                         |
| <i>ΔpdhR</i> -F1                    | <u>GCTCTAGATTATTTATTCCTATCTCTTCCCCG</u> |
| <i>ΔpdhR</i> -R1                    | AAACGCCTTCTGCCTGCTACGTTGGGATC           |
| <i>ΔpdhR</i> -F2                    | GTAGCAGGCAGAAAGGCGTTTTTCCGTCAG          |
| <i>ΔpdhR</i> -R2                    | <u>GGGGTACCTCCCTGGAGAGATGTGACCC</u>     |
| <i>ΔarcA</i> -F1                    | <u>GCTCTAGATTTTGGCTAAATCTGTGTGC</u>     |
| <i>ΔarcA</i> -R1                    | GGTCAATTGCGTGGGCCAACTGCTTGCGCCTTC       |
| <i>ΔarcA</i> -F2                    | GAAGGCGCAAGCAGTTGGCCCACGCAATTGACC       |
| <i>ΔarcA</i> -R2                    | <u>GGGGTACCTTTGAGAAGGTGATGCCG</u>       |

---

|                  |                                                         |
|------------------|---------------------------------------------------------|
| $\Delta fnr$ -F1 | <u>GGGGTACCT</u> ACTGGCCGCCGTGATG                       |
| $\Delta fnr$ -R1 | CCCAGATAGAACAAAGTGTGAGCTTAACGTATAACA<br>CTACCTGACATTGAT |
| $\Delta fnr$ -F2 | TAACGTATAACACTACCTGACATTGATAGCTCACACT<br>TTGTTCTATCTGGG |
| $\Delta fnr$ -R2 | <u>CGAGCTCAT</u> CGTGCCCCGCCTTGAAT                      |
| $\Delta crp$ -F1 | <u>GGGGTACCA</u> AAGGGAAGATTTTATAGCAGTGC                |
| $\Delta crp$ -R1 | CAAGCGACTATGTAGAGGAAATATAAAATCTCCGGTT<br>ACTTTTCCGGT    |
| $\Delta crp$ -F2 | ACCGGAAAAGTAACCGGAGATTTTATATTCCTCTAC<br>ATAGTCGCTTG     |
| $\Delta crp$ -R2 | <u>GCTCTAGAG</u> GTGATCCACTTTCGCGAA                     |

Primers for identification of plasmid

|            |                         |
|------------|-------------------------|
| pRE112-F   | CACTGTTCGTCCATTTC       |
| pRE112-R   | TTCGTCTCAGCCAATCCCT     |
| pBAD33-F   | AACAAAGCGGGACCAAAG      |
| pBAD33-R   | AGAGCGTTCACCGACAAA      |
| pMS402-F   | GGTCAAATGAATGCAGGGCT    |
| pMS402-R   | AGAGTCATTCAATATTGGCAGGT |
| pMAL-c5X-F | GGTGAAATCATGCCGAACATCC  |
| pMAL-c5X-R | TCGCAACGTTCAAATCCGCT    |

Primers for construction of complemented strain

|                   |                                          |
|-------------------|------------------------------------------|
| $\Delta pdhR$ -F1 | <u>GCTCTAGAT</u> TATTTATTCCTATCTCTTCCCCG |
| $\Delta pdhR$ -R2 | <u>GGGGTACCT</u> CCCTGGAGAGATGTGACCC     |

Primers for lux

|                     |                                       |
|---------------------|---------------------------------------|
| lux- <i>flgB</i> -F | <u>CCGCTCGAG</u> TTTTGTTTCGGTCGCAGGTG |
| lux- <i>flgB</i> -R | <u>CGGGATCCA</u> CTTAATGCCAAGACACCGC  |

---

|                               |                                         |
|-------------------------------|-----------------------------------------|
| <i>lux-flgP-F</i>             | <u>CCGCTCGAG</u> CGTAACGTTAGGGTAAAGCGG  |
| <i>lux-flgP-R</i>             | <u>CGGGATCC</u> GTAATGACATTGACACTCCGGC  |
| <i>lux-flhA-F</i>             | <u>CCGCTCGAGG</u> CAAGCTGGCATCTCTGTAC   |
| <i>lux-flhA-R</i>             | <u>CGGGATCC</u> CTATCCTCTGTCTACCGCGC    |
| <i>lux-flaC-F</i>             | <u>CCGCTCGAG</u> ATTTCTTGACATGCCGCGTT   |
| <i>lux-flaC-R</i>             | <u>CGGGATCC</u> ATCTCCGTTAAACTTGCCGC    |
| <i>lux-fliM<sub>L</sub>-F</i> | <u>CCGCTCGAGG</u> CAACGTCTTACCGGGTCTT   |
| <i>lux-fliM<sub>L</sub>-R</i> | <u>CGGGATCC</u> GCTGTGTGATACATGACGCTGA  |
| <i>lux-flgB<sub>L</sub>-F</i> | <u>CCGCTCGAG</u> CCTCGCTCAGGCGCTG       |
| <i>lux-flgB<sub>L</sub>-R</i> | <u>CGGGATCC</u> GTCCCCCTGCAAACAACG      |
| <i>lux-flgD<sub>L</sub>-F</i> | <u>CCGCTCGAGG</u> AACATGATGATGCAAGCTGG  |
| <i>lux-flgD<sub>L</sub>-R</i> | <u>CGGGATCC</u> AATCTATCCTCTGTCTACCGCG  |
| <i>lux-fliC-F</i>             | <u>CCGCTCGAGG</u> ATTGAGCGTCAGCTGCAAG   |
| <i>lux-fliC-R</i>             | <u>CGGGATCC</u> CTTGTTACTGGTATTAGGCGGAA |
| <i>lux-fliK<sub>L</sub>-F</i> | <u>CCGCTCGAG</u> CGGAAGTGATTGACGGACAG   |
| <i>lux-fliK<sub>L</sub>-R</i> | <u>CGGGATCC</u> CTCAGTGTA AAAACACCCGACC |
| <i>lux-pdhR-F</i>             | <u>CCGCTCGAG</u> CGAGAGGTAAATTCCCTGAGC  |
| <i>lux-pdhR-R</i>             | <u>CGGGATCC</u> TGAATTGAACTGCCTGCTACG   |
| <i>lux-metR-F</i>             | <u>CCGCTCGAG</u> ACATTGCCCACCATCAA ACT  |
| <i>lux-metR-R</i>             | <u>CGGGATCC</u> TCCCTGACCAAATAAGGCTCA   |
| <i>lux-nuoA-F</i>             | <u>CCGCTCGAG</u> CGTGGCTGATGAAGTTGCTT   |
| <i>lux-nuoA-R</i>             | <u>CGGGATCC</u> GGCGAGCACTACCTACAGAA    |
| <i>lux-lpdA-F</i>             | <u>CCGCTCGAG</u> CGGCGGTACAGCCTTCAC     |
| <i>lux-lpdA-R</i>             | <u>CGGGATCC</u> CGCCACGATTTTACAACCTT    |

---

Primers for qRT-PCR

|                   |                      |
|-------------------|----------------------|
| <i>gyrB</i> -RT-F | GATTTGCGCACTGGGTAGCC |
| <i>gyrB</i> -RT-R | GCGGCTGTTTGGATCCATGG |
| <i>pdhR</i> -RT-F | ATCTGGTGGTGGTGAGTGAG |
| <i>pdhR</i> -RT-R | TAAAGGCCAAATGACGGTGC |
| <i>aceE</i> -RT-F | TGGGTTCTGGCGCTATCCTG |
| <i>aceE</i> -RT-R | TCACAGCAGTCACGAACGGT |
| <i>aceF</i> -RT-F | AGCGTCTGGAATCCGGTCAG |
| <i>aceF</i> -RT-R | TGGATCCGACCCAGCTCAAC |
| <i>lpdA</i> -RT-F | GGTGGTGAATGGTCTGGGTA |
| <i>lpdA</i> -RT-R | TCCAGACCGATAATACCGCC |
| <i>sdhC</i> -RT-F | TGTTGTCCCTGTCGCTCTCC |
| <i>sdhC</i> -RT-R | GCCGTCAAAATGCCCCACAA |
| <i>sdhD</i> -RT-F | TGACGTACGGGATCTGGAAG |
| <i>sdhD</i> -RT-R | ACCAACACCACCACAAACTG |
| <i>sdhA</i> -RT-F | CAGCGCTGCAGATTTCCCAG |
| <i>sdhA</i> -RT-R | CGATGGCATTTTGGTCCCCG |
| <i>sdhB</i> -RT-F | TTTGATTGTCGACATGGGGC |
| <i>sdhB</i> -RT-R | GTATGCTGCCAGTAAACCGG |
| <i>psrA</i> -RT-F | CCCCAAGTTTGCAGCAGGTC |
| <i>psrA</i> -RT-R | CCGCACGAGTGAATAACGCC |
| <i>metR</i> -RT-F | TCCCGTACCCAAACAGCGTT |
| <i>metR</i> -RT-R | TGCCGCCACCATTTGCAATT |
| <i>tfoX</i> -RT-F | GCCCGCTTTATTGCACGAGG |

---

|                   |                      |
|-------------------|----------------------|
| <i>tfoX</i> -RT-R | GCTTTGCTAAACCACCGCGT |
| <i>nuoA</i> -RT-F | TCAGGGAGAGCGGTTGGTTG |
| <i>nuoA</i> -RT-R | GGTCCAATCCAGTGCCCCAA |
| <i>nuoB</i> -RT-F | TGGGCAAGCTGGAGGATGTT |
| <i>nuoB</i> -RT-R | CTTGACGCGGAGATGCCCTA |
| <i>cysD</i> -RT-F | GATTCAATGGCGCCGGTCAG |
| <i>cysD</i> -RT-R | CGACGGCATGCTGATGATGG |
| <i>cysJ</i> -RT-F | GATTCAATGGCGCCGGTCAG |
| <i>cysJ</i> -RT-R | CGACGGCATGCTGATGATGG |
| <i>moaB</i> -RT-F | GCTATTTTGGTCACCGGCGG |
| <i>moaB</i> -RT-R | CCAGTGCACGCGATTGGATC |
| <i>moaE</i> -RT-F | ATTGCCGCCGAATACACGTG |
| <i>moaE</i> -RT-R | GCCATTAACGCTGCCTTGCT |
| <i>modB</i> -RT-F | CTTACGACTGGCCGCGACTA |
| <i>modB</i> -RT-R | GAGCGAGGAGAGAAGGCCAG |
| <i>modC</i> -RT-F | CGTTTACTGCTGCGCGTGAT |
| <i>modC</i> -RT-R | CCATCACCATGCCCTGTTGC |
| <i>ntrC</i> -RT-F | TCATCATGACCGCCCACTCC |
| <i>ntrC</i> -RT-R | AAGGCGCGCTCAACTAATGC |
| <i>napF</i> -RT-F | GACCAGTTTATCGCGGCGTC |
| <i>napF</i> -RT-R | GCAACGCGTACACTGATCGG |
| <i>napA</i> -RT-F | ATGTGGGTGGAGAAGGAAGG |
| <i>napA</i> -RT-R | CAGGCCAACTTCATCCACC  |
| <i>napG</i> -RT-F | GCCGTGCGAGATGTGTGATG |

---

|                    |                       |
|--------------------|-----------------------|
| <i>napG</i> -RT-R  | CATGATCCAGCAACACCGCC  |
| <i>phlA</i> -RT-F  | AAGATCACCTACAGCGCCCC  |
| <i>phlA</i> -RT-R  | GGCGGCAGTCAGGGTCATAT  |
| <i>phlB</i> -RT-F  | ATGCCGACCTGTACCGCTAC  |
| <i>phlB</i> -RT-R  | CGATGAAAAGCCACGGACGG  |
| <i>flgO</i> -RT-F  | GCACTCTCCGGGCTGTTATT  |
| <i>flgO</i> -RT-R  | ATCAGATTGCCCAGCCAGTT  |
| <i>flgP</i> -RT-F  | CGGGTGTTAGAGCGTCAACT  |
| <i>flgP</i> -RT-R  | AACGAGTTCAGACCGGTGAC  |
| <i>flgM</i> -RT-F  | GCGCTGGATCCTCTGATTGA  |
| <i>flgM</i> --RT-R | TCATCACTTCGCCCAGCAAT  |
| <i>cheV</i> -RT-F  | AGCGCACACAATTAGTCGGA  |
| <i>cheV</i> -RT-R  | CAATCGCCAAGCTCATGTCTG |
| <i>flgB</i> -RT-F  | ACCGAAATGCTGGCCAGTAA  |
| <i>flgB</i> -RT-R  | CTGTCGGGCTGATTGGGAAT  |
| <i>flgK</i> -RT-F  | GGCTGAGTACACCCAAGTCT  |
| <i>flgK</i> -RT-R  | CGCATTTCAAACATCGCACC  |
| <i>flaC</i> -RT-F  | TTGCGATCGACTCATCCCTG  |
| <i>flaC</i> -RT-R  | CAGGATCTGCTGCTTGGTCA  |
| <i>fliE</i> -RT-F  | AGTGCTTTGGACTTCTCTGCT |
| <i>fliE</i> -RT-R  | TACCTGTACCGTCGCCTCAA  |
| <i>flhA</i> -RT-F  | TACGCTGTGGGTATTGTGGT  |
| <i>flhA</i> -RT-R  | TCCATGGAGCCGTAGAAGTC  |
| <i>cheY</i> -RT-F  | ATACCCACGAAGCGGATGAC  |

---

|                               |                               |
|-------------------------------|-------------------------------|
| <i>cheY</i> -RT-R             | TCTGTTACGCTTGGCTTCT           |
| <i>motA</i> -RT-F             | CCGCTCGAGTCCCCAGGTCTCAAAATCGT |
| <i>motA</i> -RT-R             | CGGGATCCCATCAAACCTCTGTGCTCGT  |
| <i>fliM<sub>L</sub></i> -RT-F | AATTTGATGACTGCTGGCGC          |
| <i>fliM<sub>L</sub></i> -RT-R | CAGACCGTTAAATGGCAGCG          |
| <i>fliH<sub>L</sub></i> -RT-F | CAGCAAGTGTTCCATCAGCA          |
| <i>fliH<sub>L</sub></i> -RT-R | CAACTGCCACTTGTTACCA           |
| <i>fliJ<sub>L</sub></i> -RT-F | TGGAATTGTTGCAGCAGGTC          |
| <i>fliJ<sub>L</sub></i> -RT-R | CTTTTGCAGCAAGGTATCGC          |
| <i>flgB<sub>L</sub></i> -RT-F | GCCGAACCGAATTATGTGGC          |
| <i>flgB<sub>L</sub></i> -RT-R | TTGCTTGCTTTAACCCGCTG          |
| <i>flgH<sub>L</sub></i> -RT-F | CAGCGATGGAAAGGGACAAG          |
| <i>flgH<sub>L</sub></i> -RT-R | GGTGTGCTCTCTTTGCCAA           |
| <i>flgK<sub>L</sub></i> -RT-F | TTGAAAGACCCAGCCGATCT          |
| <i>flgK<sub>L</sub></i> -RT-R | GTCTGAATCGCCCAATCACC          |
| <i>fliC<sub>L</sub></i> -RT-F | GTGCCCCAAACAACAACAGCA         |
| <i>fliC<sub>L</sub></i> -RT-R | CACCCAGCTGTGCCATAGAT          |
| <i>lafB</i> -RT-F             | AAAAGCTTCGTCACCGCCTA          |
| <i>lafB</i> -RT-R             | ACCTGACCTACACTGTTGCG          |
| <i>fliA<sub>L</sub></i> -RT-F | CCGCTCGAGGCAAGCTGGCATCTCTGTAC |
| <i>fliA<sub>L</sub></i> -RT-R | CGGGATCCCTATCCTCTGTCTACCGCGC  |
| <i>sipA</i> -RT-F             | TTGACTCGACATTCTGCGCT          |
| <i>sipA</i> -RT-R             | CAAATCCGGCCACAAAGCTC          |

---

|                   |                        |
|-------------------|------------------------|
| <i>sipD</i> -RT-F | GCCTGCCACGCTTGAAATTT   |
| <i>sipD</i> -RT-R | TCAGTGATCGGAAGGTTGCC   |
| <i>sipB</i> -RT-F | GCCTCAAGCGCAGACTTACT   |
| <i>sipB</i> -RT-R | CTGGGGCAATTGATGGTCCT   |
| <i>spaS</i> -RT-F | CAACCACACCAGTAGACGCA   |
| <i>spaS</i> -RT-R | AACGGATGTGAAATTGGCGC   |
| <i>spaT</i> -RT-F | GCTTCCGCTTCATCGAGTCT   |
| <i>spaT</i> -RT-R | GAAATGGTCTGGGAAGCGGT   |
| <i>spaR</i> -RT-F | TTCGCTGGATCAATCGTGCT   |
| <i>spaR</i> -RT-R | GTCATGCTGGGCCTGTTACT   |
| <i>spaQ</i> -RT-F | GTTTCACCATAACCAGCCCGA  |
| <i>spaQ</i> -RT-R | ATGATTTGATGTTTGCGGGCAA |
| <i>spaN</i> -RT-F | GCTGCTGATGTGGATTTCGC   |
| <i>spaN</i> -RT-R | CAGCCTTCAGATTCGGTGGT   |
| <i>invA</i> -RT-F | AGTTAACCACGCGCACCATA   |
| <i>invA</i> -RT-R | TCAAGGGCCACTGGAAAAGG   |
| <i>invE</i> -RT-F | CCAACACCCGCTCAAAACTG   |
| <i>invE</i> -RT-R | CAGCGTTTCGTTCAGTCTGC   |
| <i>invG</i> -RT-F | CGCCCATCCAGAGTGCTTAT   |
| <i>invG</i> -RT-R | GAGGATCTGGAGCAACTCGG   |
| <i>hila</i> -RT-F | TACAAAATCGCATTGCCGCC   |
| <i>hila</i> -RT-R | AGCTGCAGTACAATGACGCT   |



---

|                     |                            |
|---------------------|----------------------------|
| <i>prgJ</i> -RT-F   | ATTACACGCCAAGACACCGAT      |
| <i>prgJ</i> -RT-R   | TCGAGGCGAGCTAAGATTGC       |
| <i>prgK</i> -RT-F   | AGTCGCCCAGATGTTTCCTG       |
| <i>prgK</i> -RT-R   | ACGCGGACAAGTGAATGGAT       |
| 16S-RT-F            | GGCTCTTCGGACCTCATGCT       |
| 16S-RT-R            | TTCTTCACACACGCGGCATG       |
| <i>rpoS</i> -RT-F   | TTCTCCACCGCCCGAATCAA       |
| <i>rpoS</i> -RT-R   | TGCGCAACGTGTTCTGGATG       |
| Primers for EMSAs   |                            |
| <i>pdhR</i> -EMSA-F | TCCCCGCTAAAGGTGACATT       |
| <i>pdhR</i> -EMSA-R | TTGGGATCAATTTGCGCCGAC      |
| <i>metR</i> -EMSA-F | ACCAAGCAAAATCACCCACC       |
| <i>metR</i> -EMSA-R | TCCCTGACCAAATAAGGCTCA      |
| <i>nuoA</i> -EMSA-F | CGTGGCTGATGAAGTTGCTT       |
| <i>nuoA</i> -EMSA-R | GGCGAGCACTACCTACAGAA       |
| <i>tfoX</i> -EMSA-F | AAAGTTGCTTAATTGGTTGCA      |
| <i>tfoX</i> -EMSA-R | GCTCCCCTCCATAACTGCTT       |
| <i>napF</i> -EMSA-F | AAGCGCACTCTTTCAACGTG       |
| <i>napF</i> -EMSA-R | GCATGCTCCTATGACACAGC       |
| <i>lpdA</i> -EMSA-F | ACTCCAATTGTGAATGCGCC       |
| <i>lpdA</i> -EMSA-R | GCGCCACGATTTTACAACCT       |
| 16s-EMSA-F          | AGAGTTTGATCATGGCTCAGATT    |
| 16s-EMSA-R          | ACGTCAATGCCACTAGGTATTA ACT |

---

Primers for protein cloning

|                      |                                          |
|----------------------|------------------------------------------|
| pMAL- <i>pdhR</i> -F | <u>ACGCGTCGAC</u> ATGGATGTTTGCATGGCCT    |
| pMAL- <i>pdhR</i> -R | <u>CCCAAGCTTT</u> CAATCCCTGCGTTGCTG      |
| pMAL- <i>crp</i> -F  | <u>CGGGATCC</u> ATGGTTCTTGGTAAACCGCAA    |
| pMAL- <i>crp</i> -R  | <u>GGAATTCT</u> TAAACGCGTGCCGTACACC      |
| pET- <i>fnr</i> -F   | <u>CGGGATCC</u> ATGATCCCAGAGAAAAAGACGATA |
| pET- <i>fnr</i> -R   | <u>CGGAATTCT</u> TAGGCTTGTTTATTATTACCGGC |
| pET- <i>arcA</i> -F  | <u>CGGGATCC</u> ATGCAAACCCCGCACATT       |
| pET- <i>arcA</i> -R  | <u>CCCTCGAGT</u> TACTCTTCCAGCTCGCCG      |

Primers for ChIP

|                               |                                       |
|-------------------------------|---------------------------------------|
| pBAD33- <i>pdhR</i> -3×Flag-F | <u>GGGGTACCA</u> TGCAAACCCCGCACATT    |
| pBAD33- <i>pdhR</i> -3×Flag-R | <u>ACGCGTCGA</u> CTTACTCTTCCAGCTCGCCG |
| pBAD33- <i>arcA</i> -3×Flag-F | <u>GGGGTACCA</u> TGGATGTTTGCATGGCCT   |
| pBAD33- <i>arcA</i> -3×Flag-R | <u>ACGCGTCGA</u> CTCAATCCCTGCGTTGCTG  |

---

Underlined letters show KpnI、*sac*I、XbaI、BamhI、EcoRI or XhoI restriction site.

F/R: The upstream and downstream primers

**Table S3 Transcriptome revealed differential expressed genes related to PdhR of the *P. shigelloides***

| Gene id                                       | Gene name   | log2FoldChange | pvalue      |
|-----------------------------------------------|-------------|----------------|-------------|
| NODE_1_length_84377_cov_94.352280-orf00009    | -           | -5.750207073   | 0.040964585 |
| NODE_1_length_84377_cov_94.352280-orf00044    | -           | -1.657099684   | 0.045435959 |
| NODE_146_length_604099_cov_50.948364-orf00073 | -           | -1.976992473   | 0.009732694 |
| NODE_146_length_604099_cov_50.948364-orf00246 | -           | -1.527239869   | 0.000761809 |
| NODE_146_length_604099_cov_50.948364-orf00293 | -           | -2.000598368   | 0.016492881 |
| NODE_146_length_604099_cov_50.948364-orf00319 | -           | -2.133682897   | 0.014485426 |
| NODE_146_length_604099_cov_50.948364-orf00360 | <i>feoA</i> | -1.219917474   | 0.042571852 |
| NODE_146_length_604099_cov_50.948364-orf00384 | -           | -1.103668089   | 0.008708373 |
| NODE_146_length_604099_cov_50.948364-orf00486 | <i>motB</i> | -1.794287053   | 0.000178258 |

|                                               |             |              |             |
|-----------------------------------------------|-------------|--------------|-------------|
| NODE_146_length_604099_cov_50.948364-orf00487 | -           | -2.890662604 | 5.15E-07    |
| NODE_146_length_604099_cov_50.948364-orf00551 | <i>pcm</i>  | -1.203117948 | 0.011314746 |
| NODE_146_length_604099_cov_50.948364-orf00633 | -           | -6.326207331 | 0.004174171 |
| NODE_185_length_341402_cov_46.264301-orf00062 | <i>fruK</i> | -1.053623998 | 0.011632589 |
| NODE_185_length_341402_cov_46.264301-orf00119 | -           | -2.000598368 | 0.016492881 |
| NODE_185_length_341402_cov_46.264301-orf00122 | -           | -1.328464314 | 0.002489721 |
| NODE_185_length_341402_cov_46.264301-orf00194 | <i>hybC</i> | -1.024901888 | 0.017533811 |
| NODE_2_length_96615_cov_81.982597-orf00021    | <i>iacP</i> | -1.392063456 | 0.009693408 |
| NODE_2_length_96615_cov_81.982597-orf00022    | <i>sipA</i> | -1.924520502 | 9.44E-06    |
| NODE_2_length_96615_cov_81.982597-orf00023    | <i>sipD</i> | -1.83844156  | 3.64E-05    |
| NODE_2_length_96615_cov_81.982597-orf00024    | <i>sipC</i> | -1.987433636 | 4.04E-06    |
| NODE_2_length_96615_cov_81.982597-orf00025    | -           | -2.825130344 | 3.30E-07    |
| NODE_2_length_96615_cov_81.982597-orf00026    | <i>sipB</i> | -2.765008618 | 6.76E-10    |
| NODE_2_length_96615_cov_81.982597-orf00027    | <i>spaT</i> | -2.927886667 | 3.30E-10    |
| NODE_2_length_96615_cov_81.982597-orf00032    | <i>spaP</i> | -1.27545036  | 0.008594401 |
| NODE_2_length_96615_cov_81.982597-orf00036    | -           | -2.245008965 | 0.001111067 |
| NODE_2_length_96615_cov_81.982597-orf00039    | <i>invA</i> | -1.224115715 | 0.006805885 |
| NODE_2_length_96615_cov_81.982597-orf00040    | <i>invE</i> | -1.53865129  | 0.001381097 |
| NODE_2_length_96615_cov_81.982597-orf00041    | <i>invG</i> | -1.572946827 | 0.000437011 |
| NODE_2_length_96615_cov_81.982597-orf00042    | <i>invF</i> | -2.197459603 | 3.09E-06    |
| NODE_2_length_96615_cov_81.982597-orf00048    | <i>hila</i> | -1.642490729 | 0.000391751 |
| NODE_2_length_96615_cov_81.982597-orf00049    | <i>iagB</i> | -1.231936286 | 0.021782468 |
| NODE_2_length_96615_cov_81.982597-orf00050    | -           | -2.132694539 | 3.40E-06    |
| NODE_2_length_96615_cov_81.982597-orf00051    | <i>prgH</i> | -2.127195052 | 4.64E-06    |
| NODE_2_length_96615_cov_81.982597-orf00052    | <i>prgI</i> | -1.727208858 | 8.12E-05    |
| NODE_2_length_96615_cov_81.982597-orf00053    | <i>prgJ</i> | -2.096057454 | 1.97E-05    |
| NODE_2_length_96615_cov_81.982597-orf00054    | <i>prgK</i> | -1.687186935 | 0.000167784 |
| NODE_2_length_96615_cov_81.982597-orf00055    | <i>orgA</i> | -1.646968018 | 0.003514632 |
| NODE_217_length_118346_cov_49.856361-orf00015 | -           | -1.430579981 | 0.000866015 |
| NODE_217_length_118346_cov_49.856361-orf00128 | -           | -1.183875389 | 0.027595171 |
| NODE_26_length_137541_cov_47.023979-orf00021  | -           | -1.104502306 | 0.012259875 |
| NODE_26_length_137541_cov_47.023979-orf00039  | -           | -5.750207073 | 0.040964585 |
| NODE_3_length_124211_cov_75.007332-orf00052   | -           | -1.4345977   | 0.001578183 |
| NODE_46_length_93402_cov_46.306866-orf00080   | -           | -1.658804788 | 0.000263132 |
| NODE_46_length_93402_cov_46.306866-orf00090   | <i>yfiQ</i> | -1.366579597 | 0.011094044 |
| NODE_59_length_176703_cov_50.362434-orf00075  | <i>ntrC</i> | -1.059796397 | 0.025927384 |
| NODE_59_length_176703_cov_50.362434-orf00103  | -           | -4.422222292 | 1.71E-17    |
| NODE_59_length_176703_cov_50.362434-orf00106  | <i>bglB</i> | -1.266454279 | 0.003249942 |
| NODE_59_length_176703_cov_50.362434-orf00189  | -           | -1.037536327 | 0.012499403 |
| NODE_59_length_176703_cov_50.362434-orf00217  | -           | -1.327199334 | 0.001746566 |
| NODE_6_length_63404_cov_68.699402-orf00009    | <i>mgtE</i> | -2.135819427 | 0.003489554 |
| NODE_6_length_63404_cov_68.699402-orf00020    | -           | -1.539523247 | 0.034035355 |
| NODE_6_length_63404_cov_68.699402-orf00036    | -           | -3.267816144 | 0.021566548 |
| NODE_61_length_814062_cov_49.488964-orf00057  | -           | -1.033318509 | 0.013429492 |

|                                              |             |              |             |
|----------------------------------------------|-------------|--------------|-------------|
| NODE_61_length_814062_cov_49.488964-orf00077 | <i>gspL</i> | -2.082528478 | 0.011803031 |
| NODE_61_length_814062_cov_49.488964-orf00094 | -           | -1.339415441 | 0.001851816 |
| NODE_61_length_814062_cov_49.488964-orf00095 | -           | -1.105906382 | 0.016872465 |
| NODE_61_length_814062_cov_49.488964-orf00162 | -           | -2.579678447 | 7.01E-07    |
| NODE_61_length_814062_cov_49.488964-orf00163 | -           | -3.391219862 | 8.16E-11    |
| NODE_61_length_814062_cov_49.488964-orf00164 | -           | -3.645979677 | 7.30E-07    |
| NODE_61_length_814062_cov_49.488964-orf00165 | <i>FlgN</i> | -1.817227215 | 4.35E-05    |
| NODE_61_length_814062_cov_49.488964-orf00166 | -           | -1.490218837 | 0.000625681 |
| NODE_61_length_814062_cov_49.488964-orf00168 | <i>cheV</i> | -1.06445929  | 0.011904109 |
| NODE_61_length_814062_cov_49.488964-orf00169 | -           | -1.009015432 | 0.018584845 |
| NODE_61_length_814062_cov_49.488964-orf00171 | <i>flgB</i> | -3.5699263   | 1.87E-09    |
| NODE_61_length_814062_cov_49.488964-orf00172 | <i>flgC</i> | -3.595894934 | 1.42E-09    |
| NODE_61_length_814062_cov_49.488964-orf00173 | <i>flgD</i> | -3.033169359 | 9.55E-10    |
| NODE_61_length_814062_cov_49.488964-orf00174 | <i>flgE</i> | -2.348390102 | 1.56E-07    |
| NODE_61_length_814062_cov_49.488964-orf00176 | <i>flgF</i> | -3.535860394 | 3.39E-11    |
| NODE_61_length_814062_cov_49.488964-orf00177 | <i>flgG</i> | -3.809972631 | 3.07E-12    |
| NODE_61_length_814062_cov_49.488964-orf00178 | <i>flgI</i> | -3.765657527 | 1.98E-10    |
| NODE_61_length_814062_cov_49.488964-orf00179 | <i>flgJ</i> | -3.373746092 | 1.87E-08    |
| NODE_61_length_814062_cov_49.488964-orf00180 | <i>flgH</i> | -3.836949629 | 2.89E-08    |
| NODE_61_length_814062_cov_49.488964-orf00181 | <i>flgK</i> | -2.273510146 | 3.21E-07    |
| NODE_61_length_814062_cov_49.488964-orf00182 | <i>flgL</i> | -1.887984107 | 1.86E-05    |
| NODE_61_length_814062_cov_49.488964-orf00183 | <i>ogt</i>  | -1.073872858 | 0.012957894 |
| NODE_61_length_814062_cov_49.488964-orf00185 | -           | -1.297348736 | 0.031103696 |
| NODE_61_length_814062_cov_49.488964-orf00189 | -           | -1.196003017 | 0.006547409 |
| NODE_61_length_814062_cov_49.488964-orf00190 | -           | -4.08349352  | 2.38E-18    |
| NODE_61_length_814062_cov_49.488964-orf00191 | -           | -3.868553763 | 2.30E-10    |
| NODE_61_length_814062_cov_49.488964-orf00199 | <i>fliE</i> | -1.861781899 | 7.60E-05    |
| NODE_61_length_814062_cov_49.488964-orf00200 | <i>fliF</i> | -1.620280424 | 0.00027824  |
| NODE_61_length_814062_cov_49.488964-orf00201 | <i>fliG</i> | -1.37364275  | 0.004512479 |
| NODE_61_length_814062_cov_49.488964-orf00203 | <i>fliH</i> | -2.045866901 | 3.62E-05    |
| NODE_61_length_814062_cov_49.488964-orf00204 | <i>fliI</i> | -1.255474366 | 0.005640968 |
| NODE_61_length_814062_cov_49.488964-orf00205 | <i>fliJ</i> | -1.0153577   | 0.039567381 |
| NODE_61_length_814062_cov_49.488964-orf00208 | -           | -1.834389839 | 0.000211002 |
| NODE_61_length_814062_cov_49.488964-orf00209 | <i>fliL</i> | -2.229756843 | 0.000115634 |
| NODE_61_length_814062_cov_49.488964-orf00210 | <i>fliM</i> | -1.185974565 | 0.009130414 |
| NODE_61_length_814062_cov_49.488964-orf00211 | <i>fliN</i> | -1.703551515 | 0.000560961 |
| NODE_61_length_814062_cov_49.488964-orf00217 | <i>flhA</i> | -4.324663749 | 3.36E-13    |
| NODE_61_length_814062_cov_49.488964-orf00218 | <i>flhF</i> | -3.630791347 | 6.09E-11    |
| NODE_61_length_814062_cov_49.488964-orf00219 | -           | -2.279438951 | 4.04E-06    |
| NODE_61_length_814062_cov_49.488964-orf00221 | <i>fliA</i> | -1.392637227 | 0.005570857 |
| NODE_61_length_814062_cov_49.488964-orf00222 | <i>cheY</i> | -1.836814689 | 6.08E-05    |
| NODE_61_length_814062_cov_49.488964-orf00223 | <i>cheZ</i> | -1.887128506 | 2.42E-05    |
| NODE_61_length_814062_cov_49.488964-orf00225 | <i>cheA</i> | -1.797093856 | 4.49E-05    |
| NODE_61_length_814062_cov_49.488964-orf00226 | -           | -1.75045364  | 0.000116681 |

|                                              |             |              |             |
|----------------------------------------------|-------------|--------------|-------------|
| NODE_61_length_814062_cov_49.488964-orf00227 | -           | -1.533735173 | 0.002916468 |
| NODE_61_length_814062_cov_49.488964-orf00230 | -           | -1.974143246 | 4.13E-06    |
| NODE_61_length_814062_cov_49.488964-orf00232 | -           | -1.584687286 | 0.000196419 |
| NODE_61_length_814062_cov_49.488964-orf00233 | <i>idhA</i> | -2.166156755 | 4.34E-07    |
| NODE_61_length_814062_cov_49.488964-orf00234 | <i>yidK</i> | -2.122265448 | 1.08E-06    |
| NODE_61_length_814062_cov_49.488964-orf00236 | -           | -1.510833105 | 0.000657233 |
| NODE_61_length_814062_cov_49.488964-orf00237 | <i>dnaQ</i> | -1.075229099 | 0.019759328 |
| NODE_61_length_814062_cov_49.488964-orf00240 | -           | -1.831545686 | 1.79E-05    |
| NODE_61_length_814062_cov_49.488964-orf00241 | <i>mocC</i> | -2.198260576 | 2.95E-07    |
| NODE_61_length_814062_cov_49.488964-orf00242 | -           | -2.103915003 | 1.20E-06    |
| NODE_61_length_814062_cov_49.488964-orf00251 | -           | -3.643489942 | 1.46E-11    |
| NODE_61_length_814062_cov_49.488964-orf00268 | -           | -1.09108859  | 0.013613386 |
| NODE_61_length_814062_cov_49.488964-orf00273 | -           | -1.17776742  | 0.028192521 |
| NODE_61_length_814062_cov_49.488964-orf00354 | <i>phlA</i> | -2.389513772 | 3.06E-06    |
| NODE_61_length_814062_cov_49.488964-orf00355 | <i>phlB</i> | -2.160054779 | 0.006072876 |
| NODE_61_length_814062_cov_49.488964-orf00361 | <i>mgtA</i> | -1.253876042 | 0.003196059 |
| NODE_61_length_814062_cov_49.488964-orf00395 | -           | -5.120283849 | 2.21E-23    |
| NODE_61_length_814062_cov_49.488964-orf00512 | <i>napF</i> | -1.609955044 | 0.000302067 |
| NODE_61_length_814062_cov_49.488964-orf00513 | -           | -1.461133436 | 0.026780029 |
| NODE_61_length_814062_cov_49.488964-orf00514 | <i>napA</i> | -2.338655063 | 0.000187233 |
| NODE_61_length_814062_cov_49.488964-orf00515 | <i>napA</i> | -3.097202962 | 1.33E-11    |
| NODE_61_length_814062_cov_49.488964-orf00516 | <i>napG</i> | -3.195627292 | 6.24E-12    |
| NODE_61_length_814062_cov_49.488964-orf00518 | <i>napH</i> | -2.910939576 | 2.68E-10    |
| NODE_61_length_814062_cov_49.488964-orf00519 | <i>napB</i> | -3.497847412 | 9.40E-14    |
| NODE_61_length_814062_cov_49.488964-orf00520 | <i>napC</i> | -3.567934229 | 1.04E-14    |
| NODE_61_length_814062_cov_49.488964-orf00654 | <i>garL</i> | -2.245008965 | 0.001111067 |
| NODE_61_length_814062_cov_49.488964-orf00766 | -           | -1.664436485 | 0.020623756 |
| NODE_61_length_814062_cov_49.488964-orf00822 | <i>moaA</i> | -1.049106581 | 0.012641994 |
| NODE_61_length_814062_cov_49.488964-orf00823 | -           | -1.097054009 | 0.040756224 |
| NODE_61_length_814062_cov_49.488964-orf00824 | <i>moaB</i> | -1.883465992 | 1.63E-05    |
| NODE_61_length_814062_cov_49.488964-orf00826 | <i>moaC</i> | -1.906290765 | 1.64E-05    |
| NODE_61_length_814062_cov_49.488964-orf00827 | <i>moaD</i> | -2.198109652 | 8.41E-05    |
| NODE_61_length_814062_cov_49.488964-orf00828 | <i>moaE</i> | -2.218141711 | 6.24E-06    |
| NODE_61_length_814062_cov_49.488964-orf00830 | <i>modA</i> | -1.796399444 | 9.00E-05    |
| NODE_61_length_814062_cov_49.488964-orf00831 | <i>modB</i> | -1.746268299 | 0.000443675 |
| NODE_61_length_814062_cov_49.488964-orf00832 | <i>modC</i> | -1.784316519 | 5.91E-05    |
| NODE_61_length_814062_cov_49.488964-orf00865 | <i>motA</i> | -3.035940485 | 1.14E-09    |
| NODE_61_length_814062_cov_49.488964-orf00866 | <i>motB</i> | -1.267653798 | 0.00382923  |
| NODE_68_length_326006_cov_53.707497-orf00071 | <i>srlR</i> | -1.334059165 | 0.001673408 |
| NODE_68_length_326006_cov_53.707497-orf00072 | -           | -1.795880206 | 2.88E-05    |
| NODE_68_length_326006_cov_53.707497-orf00080 | <i>fliP</i> | -2.394909135 | 0.004849114 |
| NODE_68_length_326006_cov_53.707497-orf00081 | -           | -2.945271473 | 0.001665133 |
| NODE_68_length_326006_cov_53.707497-orf00082 | <i>fliM</i> | -4.262303087 | 2.30E-08    |
| NODE_68_length_326006_cov_53.707497-orf00084 | -           | -8.499732248 | 4.20E-09    |

|                                              |                   |              |             |
|----------------------------------------------|-------------------|--------------|-------------|
| NODE_68_length_326006_cov_53.707497-orf00085 | <i>fliF</i>       | -1.859439161 | 0.000293688 |
| NODE_68_length_326006_cov_53.707497-orf00086 | <i>fliG</i>       | -1.796053164 | 0.00142216  |
| NODE_68_length_326006_cov_53.707497-orf00088 | <i>fliH</i>       | -2.352885563 | 0.000266845 |
| NODE_68_length_326006_cov_53.707497-orf00089 | <i>fliI</i>       | -2.767017101 | 2.89E-05    |
| NODE_68_length_326006_cov_53.707497-orf00090 | -                 | -2.434197458 | 0.001648699 |
| NODE_68_length_326006_cov_53.707497-orf00095 | <i>flgB</i>       | -4.500591067 | 1.93E-09    |
| NODE_68_length_326006_cov_53.707497-orf00096 | -                 | -2.495302575 | 0.001197455 |
| NODE_68_length_326006_cov_53.707497-orf00098 | -                 | -4.176867767 | 0.000575412 |
| NODE_68_length_326006_cov_53.707497-orf00099 | <i>flgE</i>       | -2.556005152 | 7.66E-06    |
| NODE_68_length_326006_cov_53.707497-orf00100 | <i>lfgF</i>       | -2.447356259 | 7.11E-05    |
| NODE_68_length_326006_cov_53.707497-orf00101 | <i>lfgG</i>       | -1.690474699 | 0.002821989 |
| NODE_68_length_326006_cov_53.707497-orf00102 | <i>lfgH</i>       | -3.149516351 | 1.11E-06    |
| NODE_68_length_326006_cov_53.707497-orf00104 | <i>flgJ</i>       | -1.51880873  | 0.012302827 |
| NODE_68_length_326006_cov_53.707497-orf00105 | <i>lfgK</i>       | -2.039502626 | 3.83E-05    |
| NODE_68_length_326006_cov_53.707497-orf00108 | <i>fliC(lafA)</i> | -4.192453616 | 1.48E-17    |
| NODE_68_length_326006_cov_53.707497-orf00110 | <i>lafB</i>       | -2.405982083 | 1.03E-06    |
| NODE_68_length_326006_cov_53.707497-orf00111 | <i>lafC</i>       | -2.779792898 | 1.38E-06    |
| NODE_68_length_326006_cov_53.707497-orf00112 | <i>lafX</i>       | -2.453772617 | 0.000315485 |
| NODE_68_length_326006_cov_53.707497-orf00113 | <i>lafE</i>       | -4.481221027 | 3.93E-12    |
| NODE_68_length_326006_cov_53.707497-orf00114 | <i>lafF</i>       | -2.499714783 | 5.51E-06    |
| NODE_68_length_326006_cov_53.707497-orf00115 | <i>fliA(lafS)</i> | -2.976959898 | 1.98E-07    |
| NODE_68_length_326006_cov_53.707497-orf00116 | <i>lafT</i>       | -1.912930216 | 0.000105189 |
| NODE_68_length_326006_cov_53.707497-orf00117 | <i>lafU</i>       | -1.20648241  | 0.008913313 |
| NODE_68_length_326006_cov_53.707497-orf00130 | -                 | -1.074924935 | 0.018566488 |
| NODE_68_length_326006_cov_53.707497-orf00168 | <i>ilvM</i>       | -2.213726994 | 0.043991311 |
| NODE_68_length_326006_cov_53.707497-orf00218 | -                 | -1.502407839 | 0.002383913 |
| NODE_68_length_326006_cov_53.707497-orf00219 | -                 | -1.700975258 | 0.000886722 |
| NODE_68_length_326006_cov_53.707497-orf00227 | -                 | -1.722540804 | 0.045202178 |
| NODE_68_length_326006_cov_53.707497-orf00240 | -                 | -1.005983902 | 0.049644069 |
| NODE_68_length_326006_cov_53.707497-orf00247 | -                 | -1.418807303 | 0.001519132 |
| NODE_68_length_326006_cov_53.707497-orf00317 | <i>bioH</i>       | -1.083538544 | 0.032467048 |
| NODE_68_length_326006_cov_53.707497-orf00318 | -                 | -1.789634138 | 0.000657824 |
| NODE_69_length_373851_cov_50.515419-orf00092 | -                 | -1.20376187  | 0.006418621 |
| NODE_69_length_373851_cov_50.515419-orf00339 | -                 | -1.007001786 | 0.02891159  |
| NODE_69_length_373851_cov_50.515419-orf00341 | <i>cysC</i>       | -1.600273072 | 0.021443929 |
| NODE_69_length_373851_cov_50.515419-orf00342 | <i>cysN</i>       | -1.333400163 | 0.008504992 |
| NODE_69_length_373851_cov_50.515419-orf00343 | <i>cysD</i>       | -1.859754961 | 0.000296368 |
| NODE_69_length_373851_cov_50.515419-orf00344 | <i>cysG1</i>      | -1.475959036 | 0.005227571 |
| NODE_69_length_373851_cov_50.515419-orf00353 | <i>cysI</i>       | -1.491347666 | 0.001619109 |
| NODE_69_length_373851_cov_50.515419-orf00356 | -                 | -3.898810203 | 0.002133716 |
| NODE_69_length_373851_cov_50.515419-orf00358 | <i>cysJ</i>       | -1.87739609  | 2.11E-05    |
| NODE_69_length_373851_cov_50.515419-orf00381 | -                 | -3.523848184 | 1.15E-10    |
| NODE_69_length_373851_cov_50.515419-orf00443 | -                 | -1.900932598 | 7.41E-05    |
| NODE_7_length_42761_cov_75.093803-orf00003   | -                 | -2.794173315 | 0.004849114 |

|                                               |               |              |             |
|-----------------------------------------------|---------------|--------------|-------------|
| NODE_75_length_198257_cov_49.341919-orf00146  | -             | -2.075910839 | 0.000890608 |
| NODE_75_length_198257_cov_49.341919-orf00158  | <i>cueO</i>   | -1.385798428 | 0.002573956 |
| NODE_75_length_198257_cov_49.341919-orf00166  | -             | -1.504275879 | 0.012652254 |
| NODE_75_length_198257_cov_49.341919-orf00190  | -             | -5.750207073 | 0.040964585 |
| NODE_84_length_36912_cov_49.524055-orf00027   | <i>rfe</i>    | -1.192768237 | 0.004412395 |
| NODE_10_length_17332_cov_72.932266-orf00009   | -             | 1.013848866  | 0.041346057 |
| NODE_10_length_17332_cov_72.932266-orf00010   | -             | 1.108286955  | 0.016916751 |
| NODE_125_length_1009_cov_73.777008-orf00001   | -             | 1.316903737  | 0.015117999 |
| NODE_146_length_604099_cov_50.948364-orf00201 | <i>ompH_2</i> | 1.444110545  | 0.000558019 |
| NODE_146_length_604099_cov_50.948364-orf00249 | -             | 1.46770137   | 0.007401946 |
| NODE_146_length_604099_cov_50.948364-orf00318 | <i>rumB</i>   | 1.03547707   | 0.048027933 |
| NODE_146_length_604099_cov_50.948364-orf00338 | <i>psrA</i>   | 1.839849929  | 5.01E-05    |
| NODE_146_length_604099_cov_50.948364-orf00374 | <i>sdhD</i>   | 1.288949942  | 0.007315276 |
| NODE_146_length_604099_cov_50.948364-orf00377 | <i>sdhC</i>   | 1.574996775  | 0.000232678 |
| NODE_146_length_604099_cov_50.948364-orf00371 | <i>sdhB</i>   | 1.818568757  | 0.012495401 |
| NODE_146_length_604099_cov_50.948364-orf00372 | <i>sdhA</i>   | 1.913468262  | 0.025475297 |
| NODE_146_length_604099_cov_50.948364-orf00611 | -             | 1.098173701  | 0.018855048 |
| NODE_185_length_341402_cov_46.264301-orf00058 | -             | 1.499335848  | 0.000590913 |
| NODE_185_length_341402_cov_46.264301-orf00402 | -             | 1.197709829  | 0.010928956 |
| NODE_185_length_341402_cov_46.264301-orf00422 | -             | 2.477363328  | 0.017862218 |
| NODE_217_length_118346_cov_49.856361-orf00056 | <i>suhB</i>   | 1.081953589  | 0.0106877   |
| NODE_26_length_137541_cov_47.023979-orf00006  | <i>nuoA</i>   | 1.107712448  | 0.009522545 |
| NODE_26_length_137541_cov_47.023979-orf00007  | <i>nuoB</i>   | 1.53017634   | 0.000280526 |
| NODE_26_length_137541_cov_47.023979-orf00008  | <i>nuoCD</i>  | 1.115203185  | 0.011328459 |
| NODE_26_length_137541_cov_47.023979-orf00009  | <i>nuoE</i>   | 1.593234269  | 0.003055706 |
| NODE_26_length_137541_cov_47.023979-orf00010  | <i>nuoF</i>   | 1.775398156  | 0.026105331 |
| NODE_26_length_137541_cov_47.023979-orf00011  | <i>nuoG</i>   | 1.477528337  | 0.033996117 |
| NODE_26_length_137541_cov_47.023979-orf00012  | <i>nuoH</i>   | 1.249882103  | 0.008590078 |
| NODE_26_length_137541_cov_47.023979-orf00013  | <i>nuoI</i>   | 2.477363328  | 0.017862218 |
| NODE_26_length_137541_cov_47.023979-orf00014  | <i>nuoJ</i>   | 1.135989205  | 0.012042712 |
| NODE_26_length_137541_cov_47.023979-orf00016  | <i>nuoK</i>   | 2.37151866   | 0.02704271  |
| NODE_26_length_137541_cov_47.023979-orf00017  | <i>nuoL</i>   | 1.370051128  | 0.001293767 |
| NODE_26_length_137541_cov_47.023979-orf00018  | <i>nuoM</i>   | 1.092581292  | 0.013782123 |
| NODE_26_length_137541_cov_47.023979-orf00019  | <i>nuoN</i>   | 1.024898826  | 0.014485426 |
| NODE_61_length_814062_cov_49.488964-orf00067  | <i>epsD</i>   | 1.477528337  | 0.042814164 |
| NODE_61_length_814062_cov_49.488964-orf00116  | -             | 1.859057739  | 0.002638872 |
| NODE_61_length_814062_cov_49.488964-orf00337  | -             | 2.143533041  | 0.008135331 |
| NODE_61_length_814062_cov_49.488964-orf00441  | -             | 1.017270454  | 0.023049899 |
| NODE_61_length_814062_cov_49.488964-orf00521  | <i>dppC</i>   | 1.056265721  | 0.024094788 |
| NODE_61_length_814062_cov_49.488964-orf00586  | -             | 1.444530771  | 0.022113468 |
| NODE_61_length_814062_cov_49.488964-orf00696  | <i>metR</i>   | 1.418079285  | 0.01408992  |
| NODE_61_length_814062_cov_49.488964-orf00720  | -             | 1.38151028   | 0.005944703 |
| NODE_69_length_373851_cov_50.515419-orf00113  | -             | 1.209415573  | 0.024345879 |
| NODE_69_length_373851_cov_50.515419-orf00380  | <i>hmpX</i>   | 1.157663182  | 0.001061935 |

|                                              |             |             |             |
|----------------------------------------------|-------------|-------------|-------------|
| NODE_69_length_373851_cov_50.515419-orf00403 | -           | 2.109381983 | 0.004348298 |
| NODE_7_length_42761_cov_75.093803-orf00041   | -           | 1.044744418 | 0.00709646  |
| NODE_75_length_198257_cov_49.341919-orf00023 | -           | 5.49129475  | 0.020952111 |
| NODE_75_length_198257_cov_49.341919-orf00139 | <i>aceE</i> | 1.093449086 | 0.049131109 |
| NODE_75_length_198257_cov_49.341919-orf00143 | <i>aceF</i> | 1.031450675 | 0.040964585 |
| NODE_75_length_198257_cov_49.341919-orf00144 | <i>lpdA</i> | 1.601512237 | 0.008490836 |
| NODE_84_length_36912_cov_49.524055-orf00011  | -           | 1.850265166 | 0.008204261 |

---

Gene id: Gene number

log2FoldChange: The ratio of the gene expression levels of the treatment to control groups then taken as the logarithm of base 2

Pvalue: The p-value of the significance test
